# Supplementary material
Source: PubMed Central journal article supplement (PMC3874808)
Supplement: NIHMS505965-supplement.pdf [file NIHMS505965-supplement.pdf]

## SUPPLEMENTAL MATERIAL

Supplemental methods:

**Animals:** Cardio-myocyte specific-GRK2 deletion was obtained (GRK2<sup>f/f;Nkx2.5-cre</sup> or GRK2 del) by breeding Nkx2.5-cre and GRK2 f/f mice<sup>1</sup> (from Dr. Gerald W. Dorn II) and myocytes were isolated for cardiac contractility studies.<sup>2</sup> Vascular aortic endothelial cells and cardiac lysates from TNFR1 (TNF $\alpha$  receptor 1) and TNFR2 (TNF $\alpha$  receptor 2) knockout mice<sup>3</sup> (from Dr. Paul E. DiCorleto) were used for the study. Animals were handled according to the approved protocols and animal welfare regulation of Institutional Review Board at Cleveland Clinic.

**Cell culture and treatments:** HEK 293 cells were maintained in minimal essential medium (MEM) supplemented with 10% fetal bovine serum and penicillin-streptomycin at 37 °C as described previously.<sup>4</sup> Cells were seeded at a density of  $\sim 1 \times 10^6$  cells/ 100 mm. Cells were serum-starved before agonist stimulation. HEK-FLAG- $\beta_2$ AR cells were generously provided by Dr. Robert J. Lefkowitz, Duke University, Durham, NC. HEK 293 cells overexpressing HA- $\beta_2$ AR and GFP- $\beta$ -arrestin 2 were kindly provided by Dr. Marc G. Caron, Duke University, Durham, NC. HEK-FLAG- $\beta_2$ AR cells or HEK 293 cells in serum free media were pre-treated with various cytokines TGF $\beta$  (10 ng/mL), TNF $\alpha$  (10 ng/mL), IL-6 (50 ng/mL) or IL-13 (50 ng/mL). ISO (10  $\mu$ M) pre-treatment was carried out for 15 minutes. In all the studies we have used TNF $\alpha$  at 10 ng/ml and ISO at 10  $\mu$ M unless mentioned otherwise. Cells were re-challenged with ISO (10  $\mu$ M) for 5 minutes prior to cAMP measurement. Propranolol (100  $\mu$ M) pre-treatment was done for 30 minutes prior to TNF $\alpha$ . “n” represents the number of independent experiments. Each experiment has been carried out in triplicate.

**Endothelial cell culture:** Isolated aortic endothelial cells were plated onto 0.1% gelatin-coated 60-mm culture dishes and grown in DMEM supplemented with 15% FBS, 1% penicillin-streptomycin, 90 mg/mL heparin, 60 mg/mL EC growth supplements, and 100 U/ml fungizone at 37°C in a 95% air/5% CO<sub>2</sub> incubator as described before<sup>3</sup>. The subsequent passages were performed with 0.25% trypsin-EDTA, and cells were split in a 1:4 ratio. HL-1 myocytes culture: HL-1 cells were cultured<sup>2</sup> in Claycomb medium supplemented with 10% fetal bovine serum, 0.2 mM L-glutamine, 100 units/ml penicillin and 100 µg/ml streptomycin (all from Sigma). HL-1 cells were serum starved overnight prior to stimulation.

**Immunoprecipitation and Immunoblotting:** FLAG-β<sub>2</sub>ARs, PI3Kγ or TNFα receptors R1 or R2 were immunoprecipitated by incubating 300 µg of plasma membranes with anti-FLAG antibody (Roche), anti-PI3Kγ antibody or anti-TNFα receptor antibodies respectively along with protein A/G agarose beads over night at 4 °C. The immunoprecipitates were washed with appropriate buffers before subjecting the beads to immunoblotting or lipid kinase assays. Hearts were homogenized or cells were harvested in lysis buffer containing 20 mM Tris-HCl, pH 7.4, 137 mM NaCl, 1% NP-40, 1 mM PMSF, 20% glycerol, 10 mM NaF, 1 mM sodium orthovanadate, 2 µg/mL leupeptin and aprotinin. The lysates were cleared by centrifugation at 15,000Xg for 15 min at 4 °C. The supernatants were used for immunoprecipitation. Washed immunoprecipitates were resolved by SDS-PAGE and blotted onto PVDF membranes (BIO-RAD). Blots were blocked with 5% milk and incubated with antibodies recognizing phospho-355/356-β<sub>2</sub>AR (sc-22191-R, Santa Cruz Biotechnology)<sup>2</sup> at 1:1000 dilution, GRK 2, 3, 5 and 6 (Santa Cruz Biotechnology) at 1:1000 dilution, adenylyl cyclase V/VI at 1:1000 (Santa Cruz

Biotechnology), PI3K $\gamma$  at 1:100 (Santa Cruz Biotechnology) and FLAG (Roche)<sup>2</sup> at 1:1000 dilution. Appropriate secondary antibody (1:3000) was used and detection carried out using enhanced chemiluminescence. We tested the specificity of the phospho-355/356- $\beta_2$ AR antibody using the blocking peptide (sc-22191 P, Santa Cruz Biotechnology) by pre-incubating the blots with excess of blocking peptide followed by anti-phospho- $\beta_2$ AR antibody at 4°C in 5% BSA (Supplementary Fig. 3 D & E). We also tested the efficacy of the phospho-355/356- $\beta_2$ AR (Santa Cruz Biotechnology) antibody by immunoblotting the cardiac lysates from wild type (Wt),  $\beta_1$ AR knockout ( $\beta_1$ AR KO) and  $\beta_2$ AR knockout ( $\beta_2$ AR KO) mice along with early endosomal lysate from  $\beta_2$ AR transgenic ( $\beta_2$ AR-Tg) mice (as positive control) with the respective antibodies (Supplementary Figure 3B). We also confirmed the  $\beta$ AR density on the plasma membranes isolated from the hearts of Wt,  $\beta_1$ AR KO or  $\beta_2$ AR KO and on endosomal fraction from  $\beta_2$ AR-Tg mice, (n=6) (Supplementary Figure 3C).

**Glycosidase treatment:** Cardiac lysates (30  $\mu$ l) were incubated with glycoprotein denaturing buffer (NEB) for 10 minutes at 60°C. Samples were then incubated with G7 buffer, NP-40 and 500 U PNGase F<sup>4, 5</sup> (NEB) for 2 hours at 37°C, then blotted for phospho-355/356  $\beta_2$ AR as described above.

**Site Directed Mutagenesis:** The phosphorylation deficient (S-A) mutants of serine 355/356  $\beta_2$ AR were generated according to manufacturer's instructions (Quick change lightning site-directed mutagenesis kit, Agilent Technologies)<sup>2</sup>. The following primers were used to create respective mutations in pcDNA3.1 FLAG- $\beta_2$ AR on serine 355/356. Forward primer (S355/356A): 5'-ctatgggaatggctacgccccaacggcaacacaggg-3' and Reverse primer (S355/356A): 5'-ccctgtgttgccgttgccggcgtagccattcccatag-3'.

Purification of plasma membrane, early endosomes and late endosomes: Purification of plasma membrane, early endosomes and late endosomes was done as described previously.<sup>2</sup> Briefly, hearts or cells were homogenized in ice-cold lysis buffer containing 5 mM Tris-HCl pH 7.4, 5 mM EDTA, 1 mM PMSF, and 2 µg/mL leupeptin and aprotinin. Intact cell debris and nuclei were removed by centrifugation at 2,500Xg for 5 minutes and the supernatant was subjected to centrifugation at 37,000Xg for 20 minutes. The pelleted plasma membrane was resuspended in binding buffer (75 mM Tris-HCl, pH 7.5, 2 mM EDTA, and 12.5 mM MgCl<sub>2</sub>) for measuring βAR density and adenylyl cyclase activity, and in triton re-suspension buffer (20 mM Tris-HCl, pH 7.4, 300 mM NaCl, 1.0 % triton X-100, 1 mM PMSF, 20% glycerol, 10 mM NaF, 1 mM sodium orthovanadate, 2 µg/mL leupeptin and aprotinin) for lipid kinase assays. Early and late endosomal fractions were recovered following centrifugation of the supernatant cytosolic fraction for 1 hour at 300,000Xg and 200,000Xg respectively.

**Adenylyl cyclase assay:** Adenylyl cyclase assays were carried out by incubating 20 µg of membranes at 37 °C for 15 min with isoproterenol or NaF in 50 µL of assay mixture containing 20 mM Tris-HCl, 0.8 mM MgCl<sub>2</sub>, 2 mM EDTA, 0.12 mM ATP, 0.05 mM GTP, 0.1 mM cAMP, 2.7 mM phosphoenolpyruvate, 0.05 IU/mL myokinase, 0.01 IU/mL pyruvate kinase and <sup>32</sup>P-α-ATP and generated cAMP quantified.<sup>2</sup>

**Lipid kinase assay:** Lipid kinase assays were performed on immunoprecipitated proteins as previously described.<sup>6</sup> Briefly, pelleted beads were resuspended in 50 µl of reaction buffer (10 mM Tris-HCl, pH 7.4, 150 mM NaCl, 5 mM EDTA and 100 µM sodium-orthovanadate) and 10 µl of 100 mM MgCl<sub>2</sub>, and 10 µl of 2 mg/ml PtdIns (20 µg) sonicated in TE buffer (10 mM Tris-HCl, pH 7.4 and 1 mM EDTA) was added to each

reaction. Reactions were started by adding 10  $\mu\text{l}$  of 440  $\mu\text{M}$  ATP and 10  $\mu\text{Ci}$   $^{32}\text{P}$ - $\gamma$ -ATP, and were incubated at 25  $^{\circ}\text{C}$  for 10 min with continuous agitation, then stopped with 6N HCl. Lipids were extracted by adding 160  $\mu\text{l}$  of chloroform:methanol (1:1). After centrifugation, 30  $\mu\text{l}$  of the organic phase was spotted onto 200  $\mu\text{m}$  silica-coated TLC plates (Selecto-flexible; Fischer Scientific, Pittsburgh, PA) that were pre-coated with 1% potassium oxalate, and was resolved using chromatography with 2N glacial acetic acid:1-propanol (1:1.87). The plates were dried, exposed, and lipid phosphorylation was assessed by autoradiography.

**Confocal Microscopy:** Confocal microscopy was performed as previously described.<sup>2</sup> Briefly, HEK-FLAG- $\beta_2\text{AR}$  cells were plated onto poly L-lysine treated cover slips. Cells were serum starved for 3 hours, treated with endocytosis inhibitors 0.45M sucrose and 2%  $\beta$ -cyclodextrin for 1 hour and stimulated with 10  $\mu\text{M}$  isoproterenol for 10 min or TNF $\alpha$  (10 ng/ml) for 1 hour. Cells were fixed in 4% paraformaldehyde for 30 min, permeabilized with 0.1% triton-X 100 and incubated in 1% BSA in PBS for 1 hour. After washing in PBS they were incubated with anti-phospho-355/356- $\beta_2\text{AR}$  polyclonal antibody (1:500; Santa Cruz Biotechnology) in 1% BSA in PBS for 1 hour. Washed cells were incubated with goat anti-rabbit IgG conjugated with AlexaFlour 488 (1:1000; Molecular probes, Eugene, OR) for 1 hour. Samples were visualized using sequential line excitation at 488 for green, with appropriate emission filters.

**Cardiac contractility:** Peak contraction was measured as the percentage of peak cell shortening. Myocytes were pre-treated with ISO for 30 min or TNF $\alpha$  for 45 minutes and stimulated with ISO to assess myocyte contractility. Each data point represents myocytes isolated from 5 different animals from each of the genotypes with at least ~30 cells

averaged/treatment. Isolated myocytes were maintained in high calcium containing buffer and contractility of the myocytes was assessed using IonOptix System.

## Supplemental Table:

Supplementary Table 1: Morphometric and echocardiographic analysis of Myo-Tg and wild type littermate controls

|              | 4 weeks    |                         | 8 weeks    |                         | 12 weeks   |                           | 16 weeks   |                            | 36 weeks   |                            |
|--------------|------------|-------------------------|------------|-------------------------|------------|---------------------------|------------|----------------------------|------------|----------------------------|
|              | Wt         | Myo-Tg                  | Wt         | Myo-Tg                  | Wt         | Myo-Tg                    | Wt         | Myo-Tg                     | Wt         | Myo-Tg                     |
| HW/BW (mg/g) | 4.71 ± 0.3 | 5.51 ± 0.3 <sup>a</sup> | 4.77 ± 0.4 | 5.91 ± 0.4 <sup>a</sup> | 4.80 ± 0.8 | 6.50 ± 0.7 <sup>a,b</sup> | 4.91 ± 0.6 | 7.32 ± 0.81 <sup>a,b</sup> | 5.10 ± 0.8 | 9.91 ± 0.65 <sup>a,b</sup> |
| LVEDD (mm)   | 2.38 ± 0.3 | 2.80 ± 0.3 <sup>a</sup> | 2.39 ± 0.4 | 2.90 ± 0.3 <sup>a</sup> | 2.41 ± 0.2 | 3.09 ± 0.7 <sup>a,b</sup> | 2.43 ± 0.2 | 3.69 ± 0.1 <sup>a,b</sup>  | 2.45 ± 0.2 | 5.47 ± 0.4 <sup>a,b</sup>  |
| LVESD (mm)   | 0.93 ± 0.1 | 1.26 ± 0.3 <sup>a</sup> | 0.94 ± 0.2 | 1.36 ± 0.5 <sup>a</sup> | 0.99 ± 0.2 | 1.66 ± 0.3 <sup>a,b</sup> | 0.97 ± 0.1 | 2.39 ± 0.2 <sup>a,b</sup>  | 1.07 ± 0.1 | 4.57 ± 0.2 <sup>a,b</sup>  |
| IVS (mm)     | 0.74 ± 0.1 | 0.89 ± 0.2 <sup>a</sup> | 0.76 ± 0.3 | 0.91 ± 0.4 <sup>a</sup> | 0.79 ± 0.2 | 1.01 ± 0.1 <sup>a,b</sup> | 0.86 ± 0.3 | 1.19 ± 0.1 <sup>a,b</sup>  | 1.01 ± 0.1 | 0.71 ± 0.2 <sup>b</sup>    |
| % FS         | 60.1 ± 1.4 | 55.9 ± 1.5 <sup>a</sup> | 58.1 ± 1.9 | 53.9 ± 1.3 <sup>a</sup> | 57.6 ± 1.7 | 46.3 ± 1.1 <sup>a,b</sup> | 59.3 ± 2.0 | 35.6 ± 1.7 <sup>a,b</sup>  | 56.3 ± 1.7 | 16.0 ± 1.8 <sup>a,b</sup>  |

HW, heart weight, BW, body weight, LVEDD, left ventricular end diastolic diameter, LVESD, left ventricular end systolic diameter  
 % FS, percent fractional shortening, <sup>a</sup> p<0.05 versus respective Wt, <sup>b</sup> p<0.05 versus 4 & 8 weeks Myo-Tg. Comparisons were made using student's *t* test with Bonferoni correction for multiple comparisons.

Supplementary Figure 1

**A**

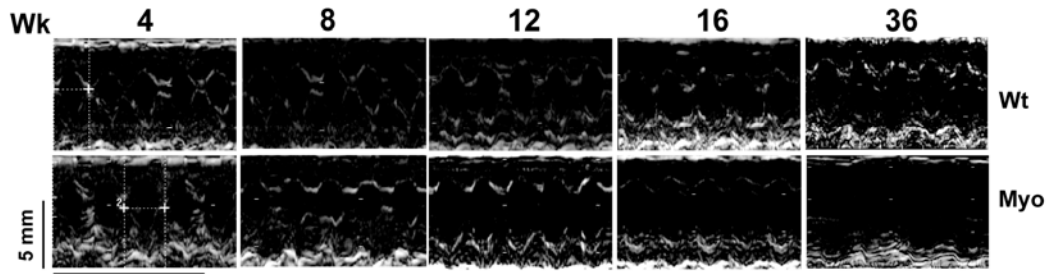

**B**

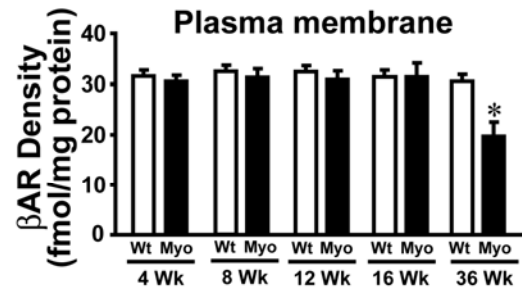

**C**

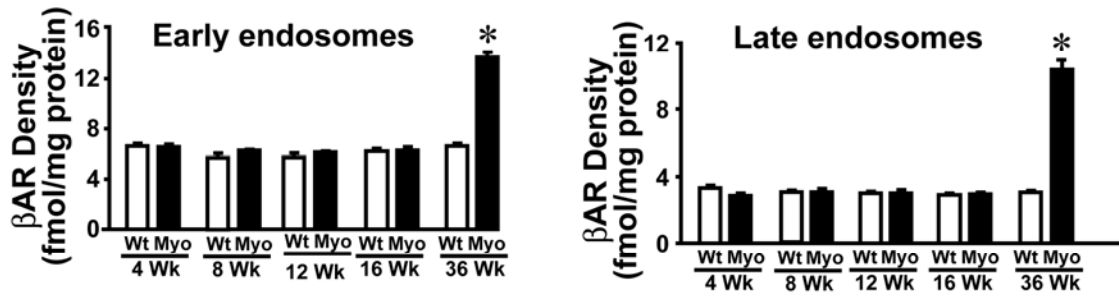

**D**

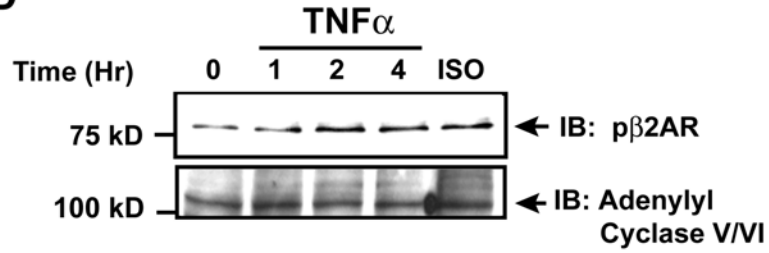



Supplementary Figure 2

**A** Metabolic labeling ( $^{32}\text{P}$ i) of cells to determine  $\beta 2\text{AR}$  phosphorylation

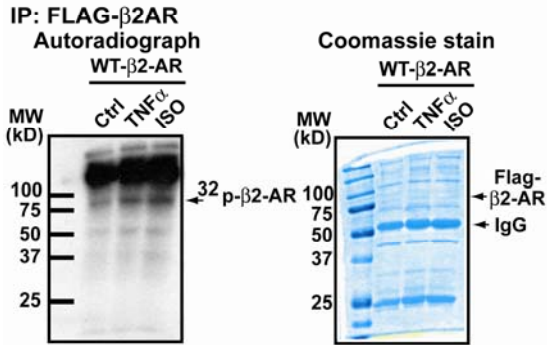

**B** Metabolic labeling in cells expressing Wt and mutant  $\beta 2\text{AR}$

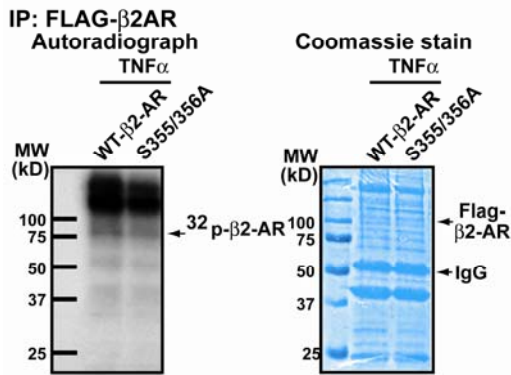

**C** Cells transfected with Wt and mutant  $\beta 2\text{AR}$

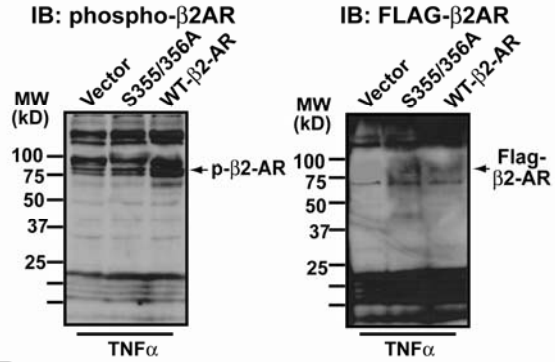

**D** Cells transfected with Wt and mutant  $\beta 2\text{AR}$

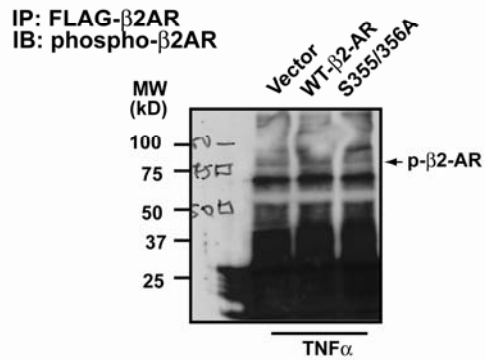

# Supplementary Figure 3

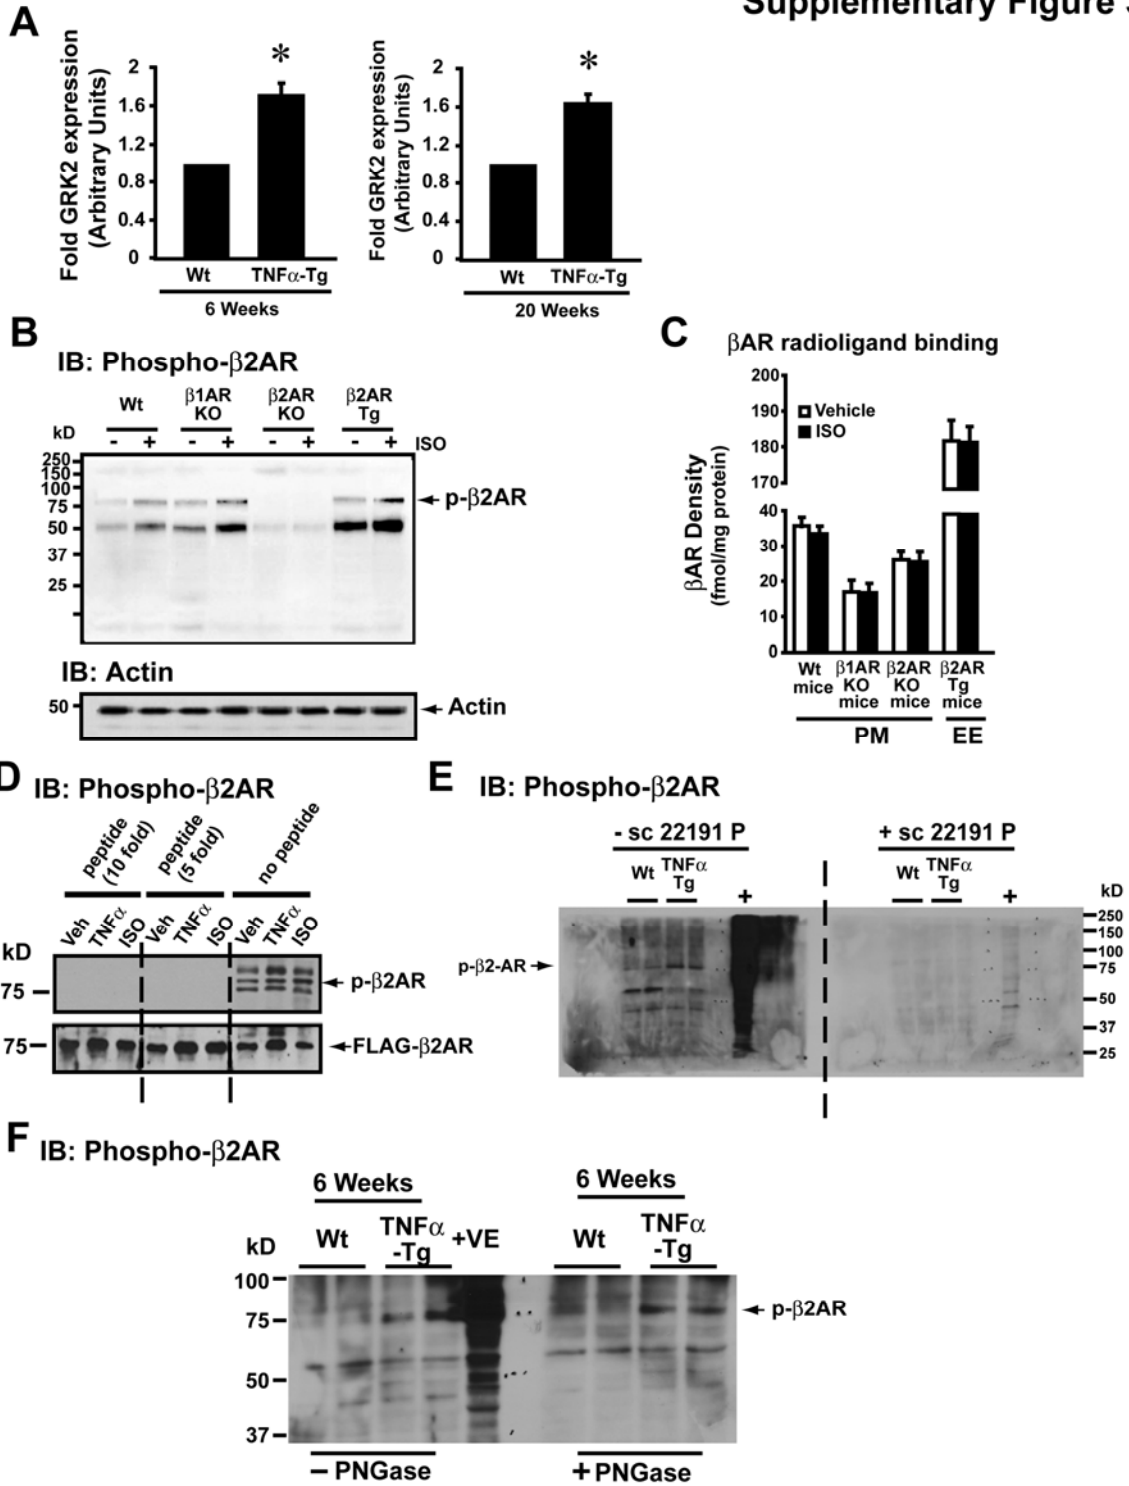

Supplementary Figure 4

**A**

**PI3K assay in myotrophin mice**

IP: PI3K $\gamma$ ; Assay: PI3K $\gamma$  activity (Plasma membrane)

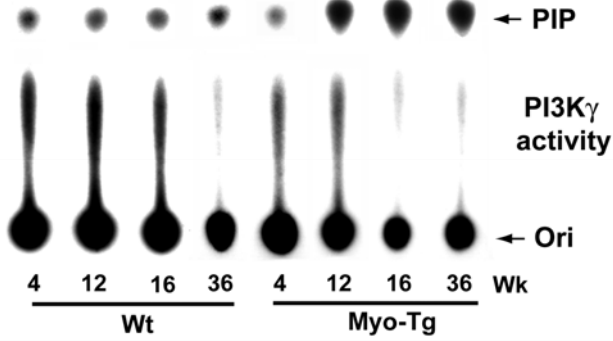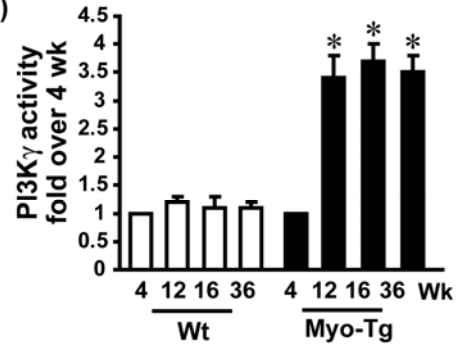

**B**

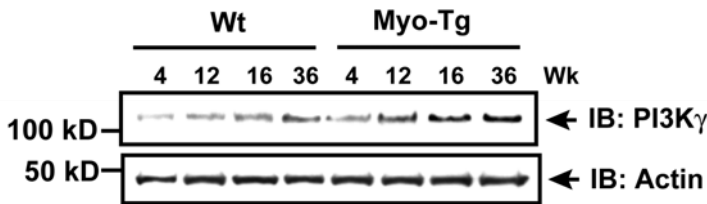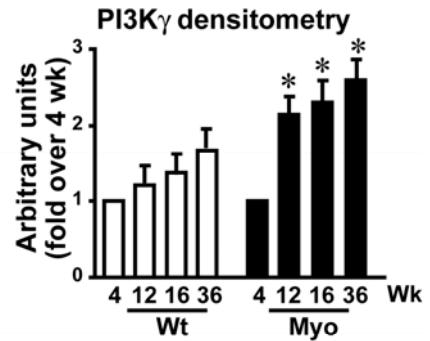

**C**

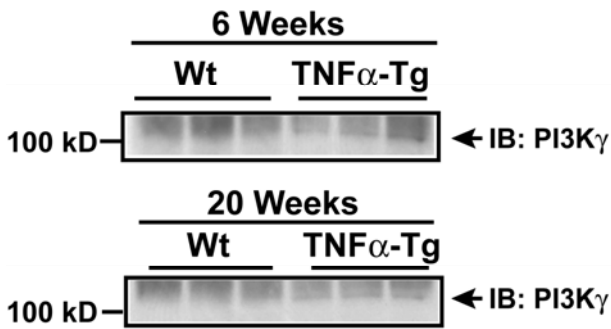

**D**

**PI3K assay in HL-1 cardiac myocytes treated with TNF $\alpha$ :**

IP: PI3K $\gamma$ , Assay: PI3K activity (Plasma membrane)

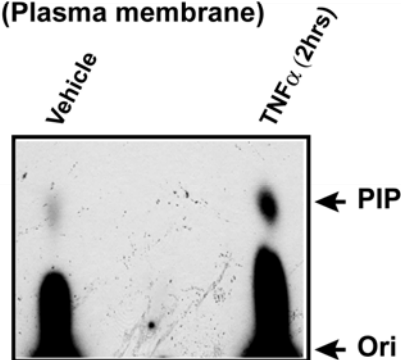

## Supplementary Figure Legends:

Supplementary Figure 1. (A) Echocardiographic images of Wt and Myo-Tg mice at 4, 8, 12, 16 and 36 weeks of age. (B)  $\beta$ AR density on the plasma membranes isolated from the hearts of Wt and Myo-Tg mice at 4, 8, 12, 16 and 36 weeks of age, (n=6), \*p< 0.001 versus 36 weeks Wt. (C)  $\beta$ AR density on the early endosomes (left panel) and late endosomes (right panel) from the hearts of Wt and Myo-Tg mice at 4, 8, 12, 16, and 36 weeks of age. (n=6), \*p< 0.001 versus 36 weeks Wt. (D) Upper panel: Lysates from HL-1 cardiac myocytes following vehicle or TNF $\alpha$  treatment were immunoblotted for phospho- $\beta_2$ AR. Lower Panel: Lysates from HL-1 cardiac myocytes treated with Vehicle or TNF $\alpha$  for 1, 2 and 4 hours were immuno blotted for adenylyl cyclase V/VI. Lysates from ISO treated HEK-FLAG- $\beta_2$ AR cells were used as control.

Supplementary Figure 2. (A) HEK-FLAG- $\beta_2$ AR cells were metabolically labeled with  $^{32}$ Pi, treated with TNF $\alpha$  or ISO (n=4).  $\beta_2$ ARs were immunoprecipitated using anti-FLAG antibody, resolved on SDS-PAGE and autoradiography performed (n=4). Coomassie stained gel showing equal IP is shown on the right side panel. (B) HEK 293 cells were transfected with FLAG- $\beta_2$ AR Wt or serine 355/356 mutant  $\beta_2$ AR cDNA constructs, metabolically labeled with  $^{32}$ Pi, followed by TNF $\alpha$  or ISO (n=4). Wt or mutant  $\beta_2$ ARs were immunoprecipitated using anti-FLAG antibody, resolved on SDS-PAGE and autoradiography performed (n=4). Coomassie stained gel showing equal IP is shown on the right side panel. (C) HEK 293 cells were transfected with FLAG- $\beta_2$ AR Wt or serine 355/356 mutant  $\beta_2$ AR cDNA constructs and treated with TNF $\alpha$ . Following

treatment, the lysates were immunoblotted with anti-phospho- $\beta_2$ AR antibody (left panel) stripped and re-probed with anti-FLAG antibody (right). (D) HEK 293 cells were transfected with FLAG- $\beta_2$ AR Wt or serine 355/356 mutant  $\beta_2$ AR cDNA constructs, treated with TNF $\alpha$  and  $\beta_2$ ARs were immunoprecipitated using anti-FLAG antibody. The immunoprecipitates were resolved and immunoblotted with anti-phospho- $\beta_2$ AR antibody.

Supplementary Figure 3. (A) Densitometric analysis of the GRK2 immunoblots shown in Fig. 6A from Wt and TNF $\alpha$ -Tg mice at 6 or 20 weeks of age, \* $p < 0.001$  versus Wt. (B) Cardiac lysates from Wt,  $\beta_1$ AR KO or  $\beta_2$ AR KO along with early endosomal fraction from  $\beta_2$ AR-Tg mice were immunoblotted for phospho- $\beta_2$ AR. The blot was stripped and re-probed for  $\beta$ -actin. (C)  $\beta$ AR density on the plasma membranes isolated from the hearts of Wt,  $\beta_1$ AR KO or  $\beta_2$ AR KO and early endosomes from  $\beta_2$ AR-Tg mice, (n=6). (D) Specificity of the phospho-355/356  $\beta_2$ AR antibody was confirmed by immunoblotting the lysates from TNF $\alpha$  or ISO treated  $\beta_2$ AR cells using the blocking peptide (sc-22191 P, Santa Cruz Biotechnology). (E) Cardiac lysates from 6 weeks old Wt and TNF $\alpha$ -Tg mice were tested for the specificity of phospho-355/356  $\beta_2$ AR antibody by immunoblotting in presence and absence of the blocking peptide (sc-22191 P, Santa Cruz Biotechnology). (F) Cardiac lysates from 6 weeks old Wt and TNF $\alpha$ -Tg mice were treated with the glycosidase enzyme PNGase F and immunoblotted for phospho- $\beta_2$ AR.

Supplementary Figure 4. (A) Left Panel: Representative PI3K $\gamma$  activity in cardiac plasma membranes from the hearts of Wt and Myo-Tg mice at 4, 12, 16 and 36 weeks of age. Summary data (n=6) are on the right panel. Ori, origin; PIP, phosphatidylinositol mono-phosphate. \*\*p < 0.01 versus Myo-Tg 4 weeks. (B) Left Panel: Immunoblotting for PI3K $\gamma$  and actin from cardiac lysates of Wt and Myo-Tg mice at 4, 12, 16 and 36 weeks of age. Right Panel: Summary data of densitometric analysis of PI3K $\gamma$ . (n=6) \*p < 0.001 versus Myo-Tg 4 weeks. (C) Cardiac lysates from Wt and TNF $\alpha$ -Tg mice at 6 or 20 weeks of age immunoblotted for PI3K $\gamma$ . (D) Representative PI3K $\gamma$  activity at the plasma membranes from HL-1 cardiac myocytes following TNF $\alpha$  for 2 hours.

## Supplemental References:

1. Matkovich SJ, Diwan A, Klanke JL, Hammer DJ, Marreez Y, Odley AM, Brunskill EW, Koch WJ, Schwartz RJ, Dorn GW, 2nd. Cardiac-specific ablation of g-protein receptor kinase 2 redefines its roles in heart development and beta-adrenergic signaling. *Circ Res.* 2006;99:996-1003
2. Vasudevan NT, Mohan ML, Gupta MK, Hussain AK, Naga Prasad SV. Inhibition of protein phosphatase 2a activity by pi3kgamma regulates beta-adrenergic receptor function. *Mol Cell.* 2011;41:636-648
3. Chandrasekharan UM, Siemionow M, Unsal M, Yang L, Poptic E, Bohn J, Ozer K, Zhou Z, Howe PH, Penn M, DiCorleto PE. Tumor necrosis factor alpha (tnf-alpha) receptor-ii is required for tnf-alpha-induced leukocyte-endothelial interaction in vivo. *Blood.* 2007;109:1938-1944
4. Francica JR, Varela-Rohena A, Medvec A, Plesa G, Riley JL, Bates P. Steric shielding of surface epitopes and impaired immune recognition induced by the ebola virus glycoprotein. *PLoS Pathog.* 2010;6:e1001098
5. Tran TM, Friedman J, Baameur F, Knoll BJ, Moore RH, Clark RB. Characterization of beta2-adrenergic receptor dephosphorylation: Comparison with the rate of resensitization. *Mol Pharmacol.* 2007;71:47-60
6. Naga Prasad SV, Jayatilleke A, Madamanchi A, Rockman HA. Protein kinase activity of phosphoinositide 3-kinase regulates beta-adrenergic receptor endocytosis. *Nat Cell Biol.* 2005;7:785-796
